# Supplementary material for: Effect of Two Kinds of Fertilizers on Growth and Rhizosphere Soil Properties of Bayberry with Decline Disease
Source: MDPI journal article supplement (doi:10.3390/plants10112386), 2021-11-05
Supplement: s1 [file s1]

## Supplementary data

Table S1. Contribution of soil environment to bacteria and fungi taxa at the phylum level.

| Soil environment                | Contribution at the bacterial<br>phylum level (%) | Contribution at the fungal phylum<br>level (%) |
|---------------------------------|---------------------------------------------------|------------------------------------------------|
| pH                              | 3.2                                               | 1.4                                            |
| Organic Matter                  | 5.6                                               | 8.6                                            |
| Alkali-hydrolyzable<br>nitrogen | 14.2                                              | 0.3                                            |
| Available Phosphorus            | 7.1                                               | 8.4                                            |
| Exchangeable calcium            | 11.2                                              | 5.3                                            |
| Exchangeable magnesium          | 11.2                                              | 1.1                                            |

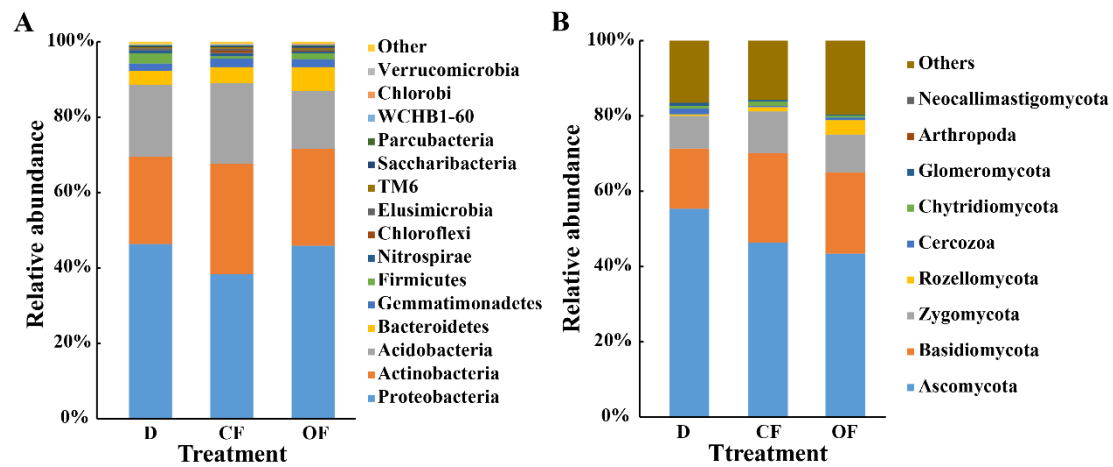

**Figure S1.** Relative abundance of bacteria (A) and fungi (B) at the phylum level. D, CF, and OF represented decline diseased trees, in combination with either compound fertilizer or bio-organic fertilizer, respectively.

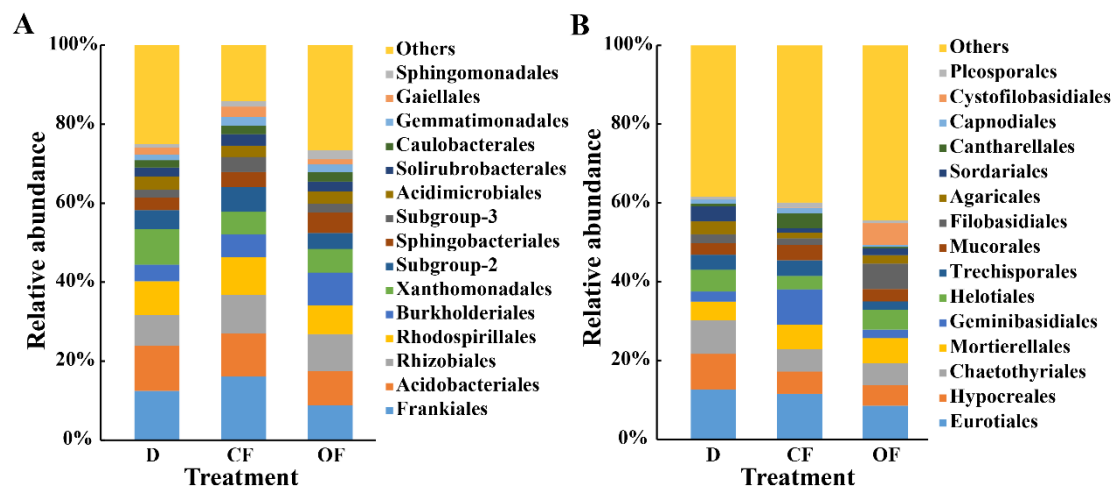

**Figure S2.** Relative abundance of bacteria (A) and fungi (B) at the order level. D, CF, and OF represented decline diseased trees, in combination with either compound fertilizer or bio-organic fertilizer, respectively.



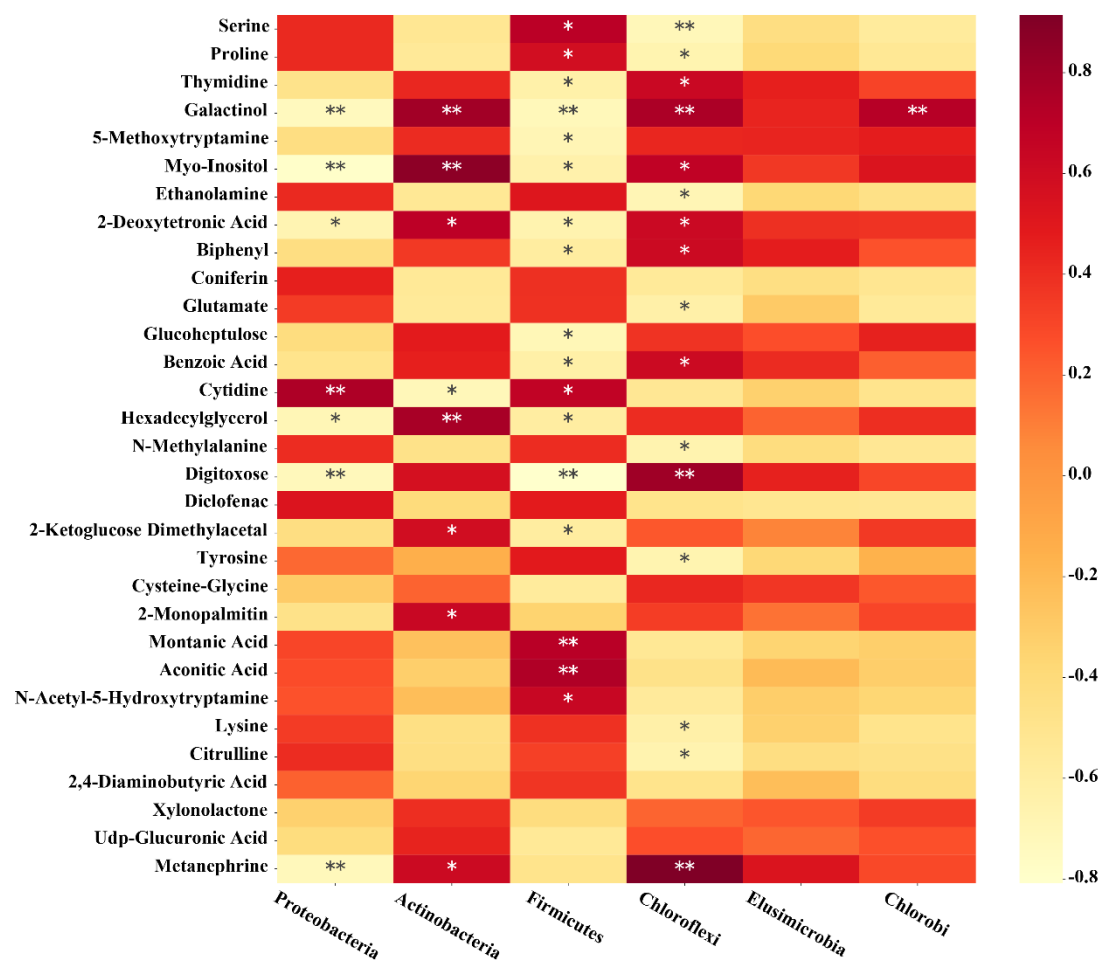

**Figure S4.** Heatmap of correlation analysis between the microorganism relative abundances at phylum level and the metabolite relative contents of the compound fertilizer treatment. \* and \*\* indicate a significant correlation at  $P < 0.05$  and  $P < 0.01$ , respectively. The depth of the orange scale represents the magnitude of the correlation coefficient, the darker color is the greater positive correlation, the lighter color is the greater negative correlation.

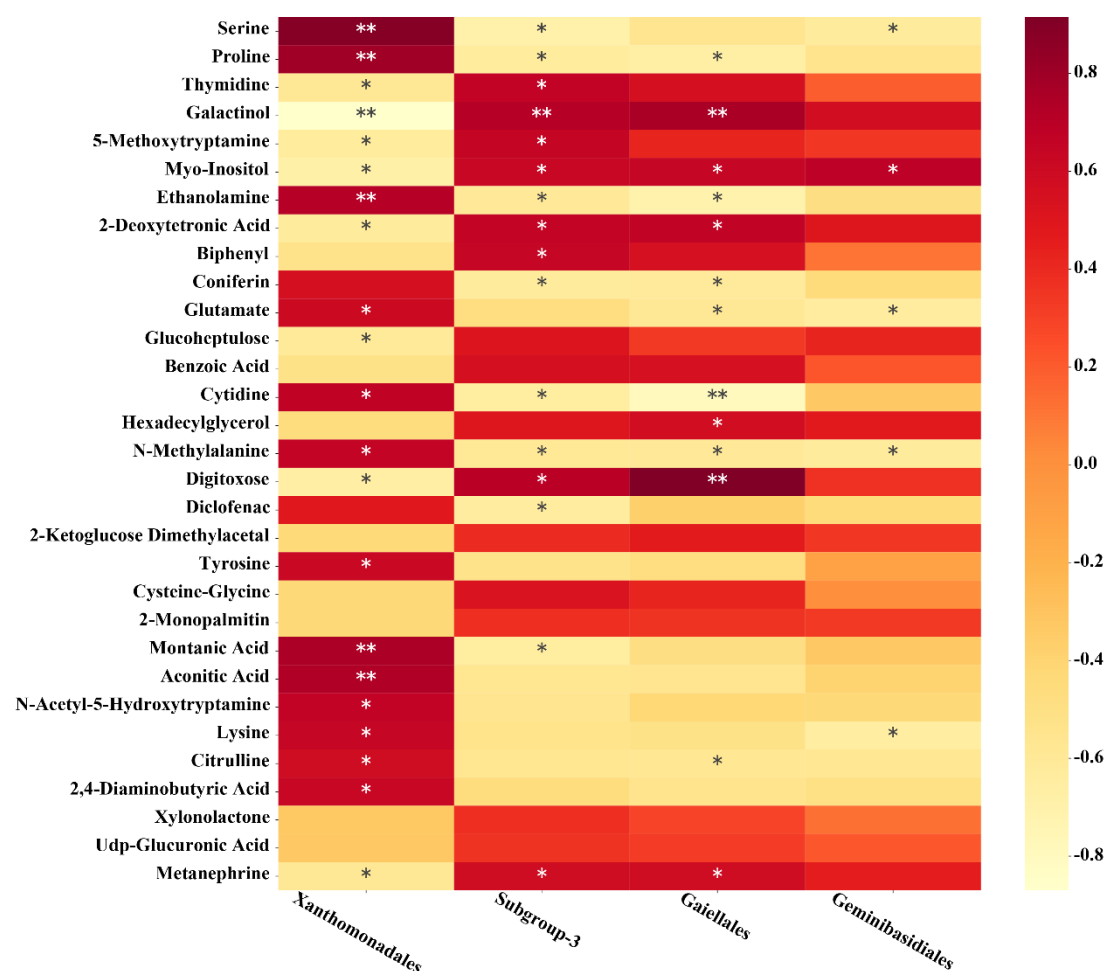

**Figure S5.** Heatmap of correlation analysis between the microorganism relative abundances at order level and the metabolite relative contents of the compound fertilizer treatment. \* and \*\* indicate a significant correlation at  $P < 0.05$  and  $P < 0.01$ , respectively. The depth of the orange scale represents the magnitude of the correlation coefficient, the darker color is the greater positive correlation, the lighter color is the greater negative correlation.

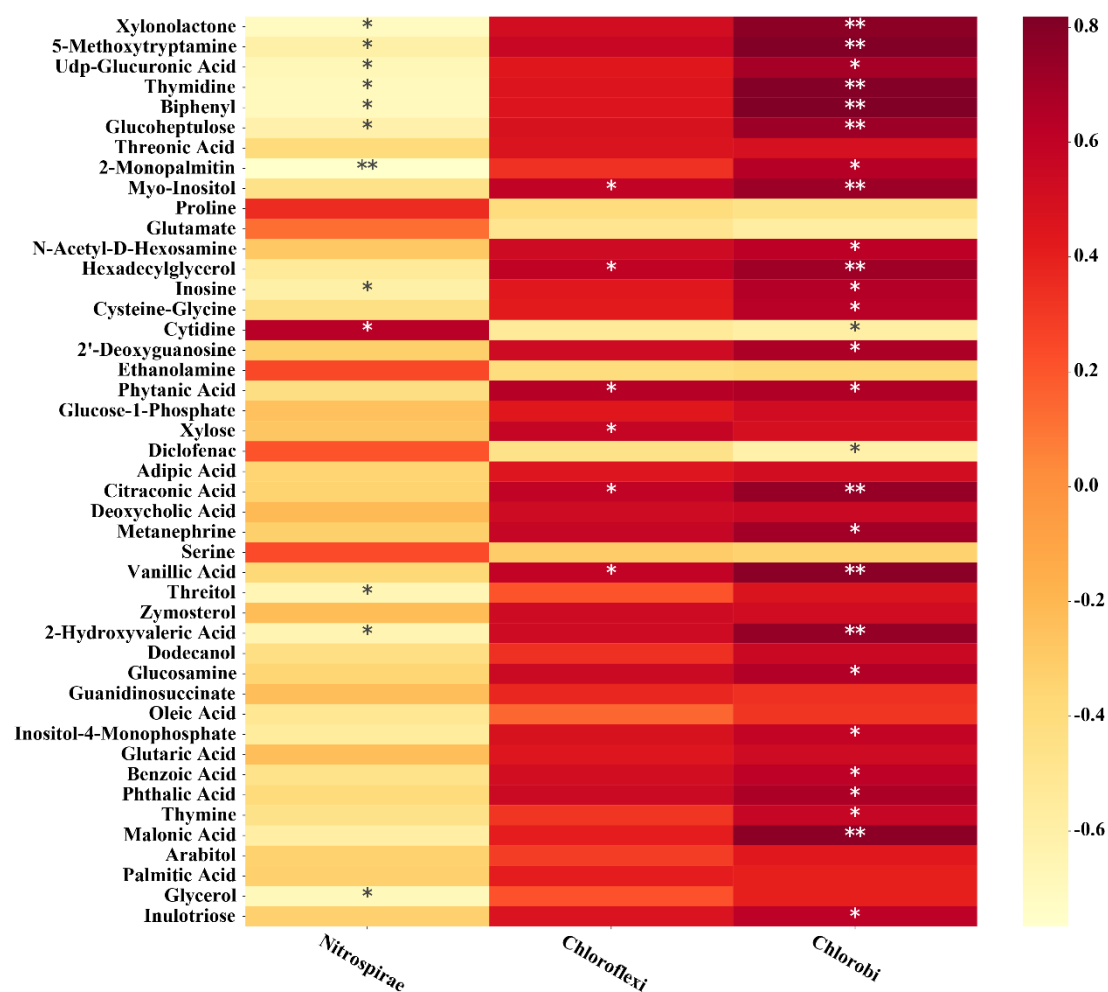

**Figure S6.** Heatmap of correlation analysis between the microorganism relative abundances at phylum level and the metabolite relative contents of the bio-organic fertilizer treatment. \* and \*\* indicate a significant correlation at  $P < 0.05$  and  $P < 0.01$ , respectively. The depth of the orange scale represents the magnitude of the correlation coefficient, the darker color is the greater positive correlation, the lighter color is the greater negative correlation.

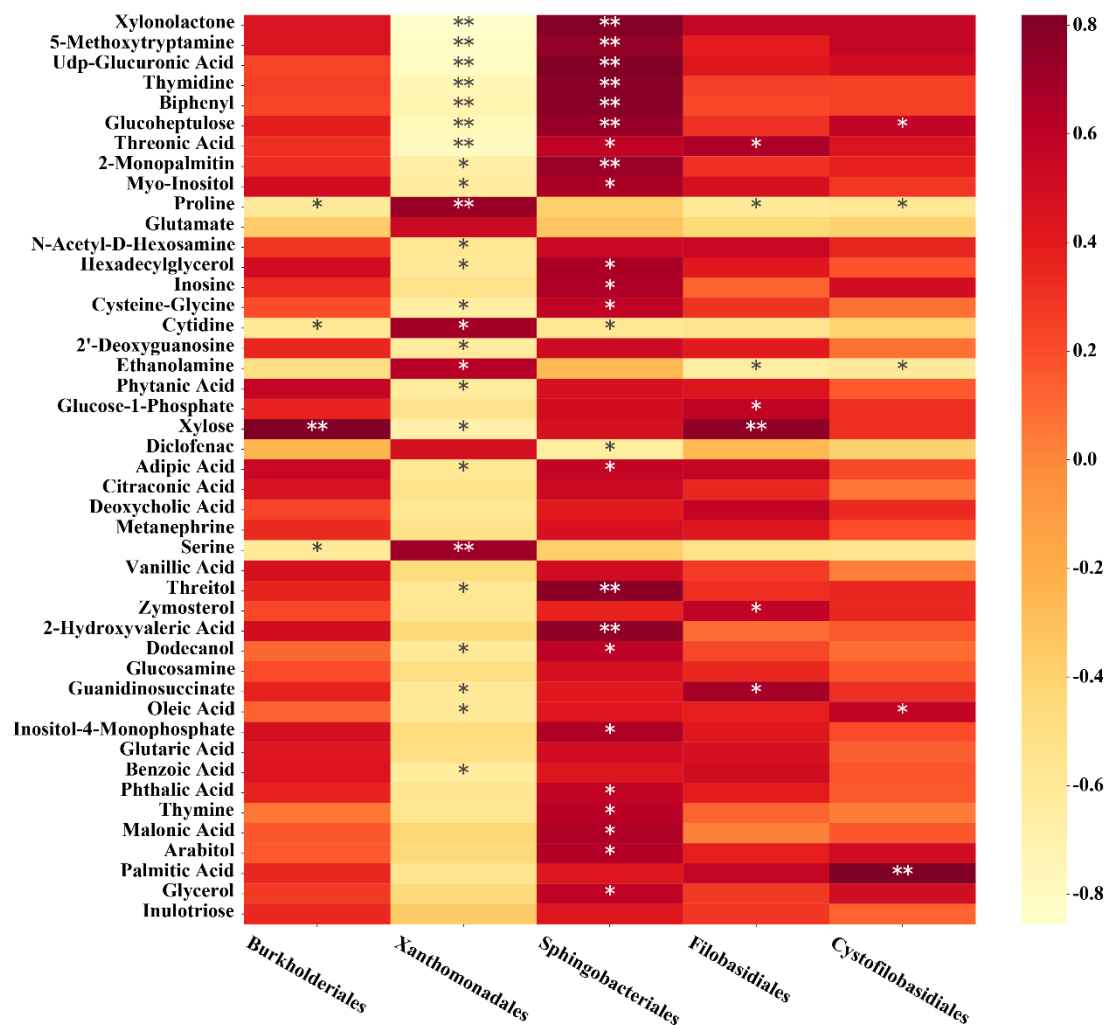

**Figure S7.** Heatmap of correlation analysis between the microorganism relative abundances at order level and the metabolite relative contents of the bio-organic fertilizer treatment. \* and \*\* indicate a significant correlation at  $P < 0.05$  and  $P < 0.01$ , respectively. The depth of the orange scale represents the magnitude of the correlation coefficient, the darker color is the greater positive correlation, the lighter color is the greater negative correlation.
